# Supplementary material for: Lateral Shift of the Femoral Condyle After Total Knee Arthroplasty: Simulation Using 2d-templates of the Medial Pivot Design on Knee Radiographs of Young Japanese Patients
Source: Research Square preprint supplement (doi:10.21203/rs.3.rs-592112/v1), 2021-06-10
Supplement: Supplementary file 1 [file 4fcef3e73b2bb1e750e61223.xlsx]

## Sheet: Sheet1
Table 3. Correlations between radiographic parameters and lateral shift of the femoral condyle
	Age	FTA	LDFA	MPTA	Lateral shift
Age		-0.024	0.132	0.142	-0.027
FTA			0.505**	-0.355**	0.220*
LDFA				0.309**	-0.215*
MPTA					-0.553**
Lateral shift
FTA: femorotibial angle, LDFA: lateral distal femoral angle, MPTA: medial proximal tibial angle. Significantly different. *p < 0.05, **p < 0.01.
